# Supplementary material
Source: MDPI journal article supplement (https://www.mdpi.com/2308-3417/7/5/103)
Supplement: s1 [file s1]

|                                    |          |                                                                                                                                                                                                                        |                           |
|------------------------------------|----------|------------------------------------------------------------------------------------------------------------------------------------------------------------------------------------------------------------------------|---------------------------|
| Data items                         | 13       | List and define all variables for which data were sought (e.g., PICOS, funding sources) and any assumptions and simplifications made.                                                                                  | 4                         |
| Risk of bias in individual studies | 14       | Describe methods used for assessing risk of bias of individual studies (including specification of whether this was done at the study or outcome level), and how this information is to be used in any data synthesis. | 5-6                       |
| <b>Section/topic</b>               | <b>#</b> | <b>Checklist item</b>                                                                                                                                                                                                  | <b>Reported on page #</b> |
| Summary measures                   | 15       | State the principal summary measures (e.g., risk ratio, difference in means).                                                                                                                                          | 5-6                       |
| Synthesis of results               | 16       | Describe the methods of handling data and combining results of studies, if done, including measures of consistency (e.g., $I^2$ ) for each meta-analysis.                                                              | 5-6                       |
| Risk of bias across studies        | 17       | Specify any assessment of risk of bias that may affect the cumulative evidence (e.g., publication bias, selective reporting within studies).                                                                           | 5-7                       |
| Additional analyses                | 18       | Describe methods of additional analyses (e.g., sensitivity or subgroup analyses, meta-regression), if done, indicating which were pre-specified.                                                                       | none                      |
| <b>RESULTS</b>                     |          |                                                                                                                                                                                                                        |                           |
| Study selection                    | 19       | Give numbers of studies screened, assessed for eligibility, and included in the review, with reasons for exclusions at each stage, ideally with a flow diagram.                                                        | Figure one                |
| Study characteristics              | 20       | For each study, present characteristics for which data were extracted (e.g., study size, PICOS, follow-up period) and provide the citations.                                                                           | 4-8                       |
| Risk of bias within studies        | 22       | Present data on risk of bias of each study and, if available, any outcome level assessment (see item 12).                                                                                                              | 4-8                       |
| Results of individual studies      | 23       | For all outcomes considered (benefits or harms), present, for each study: (a) simple summary data for each intervention group (b) effect estimates and confidence intervals, ideally with a forest plot.               | N/A                       |
| Synthesis of results               | 24       | Present results of each meta-analysis done, including confidence intervals and measures of consistency.                                                                                                                | N/A                       |
| Risk of bias across studies        | 25       | Present results of any assessment of risk of bias across studies (see Item 15).                                                                                                                                        | 8                         |
| Additional analysis                | 26       | Give results of additional analyses, if done (e.g., sensitivity or subgroup analyses, meta-regression [see Item 16]).                                                                                                  | N/A                       |
| <b>DISCUSSION</b>                  |          |                                                                                                                                                                                                                        |                           |
| Summary of evidence                | 27       | Summarize the main findings including the strength of evidence for each main outcome; consider their relevance to key groups (e.g., healthcare providers, users, and policy makers).                                   | 8-9                       |

|             |    |                                                                                                                                                               |     |
|-------------|----|---------------------------------------------------------------------------------------------------------------------------------------------------------------|-----|
| Limitations | 28 | Discuss limitations at study and outcome level (e.g., risk of bias), and at review-level (e.g., incomplete retrieval of identified research, reporting bias). | 8-9 |
| Conclusions | 29 | Provide a general interpretation of the results in the context of other evidence, and implications for future research.                                       | 8-9 |

From: Moher D, Liberati A, Tetzlaff J, Altman DG, The PRISMA Group (2009). Preferred Reporting Items for Systematic Reviews and Meta-Analyses: The PRISMA Statement. PLoS Med 6(6): e1000097. doi:10.1371/journal.pmed1000097

For more information, visit: [www.prisma-statement.org](http://www.prisma-statement.org).
